# Supplementary material for: Voltammetric Response of Alizarin Red S-Confined Film-Coated Electrodes to Diol and Polyol Compounds: Use of Phenylboronic Acid-Modified Poly(ethyleneimine) as Film Component
Source: MDPI journal article supplement (doi:10.3390/s18010317), 2018-01-22
Supplement: s1 [file s1]

## Supplementary data

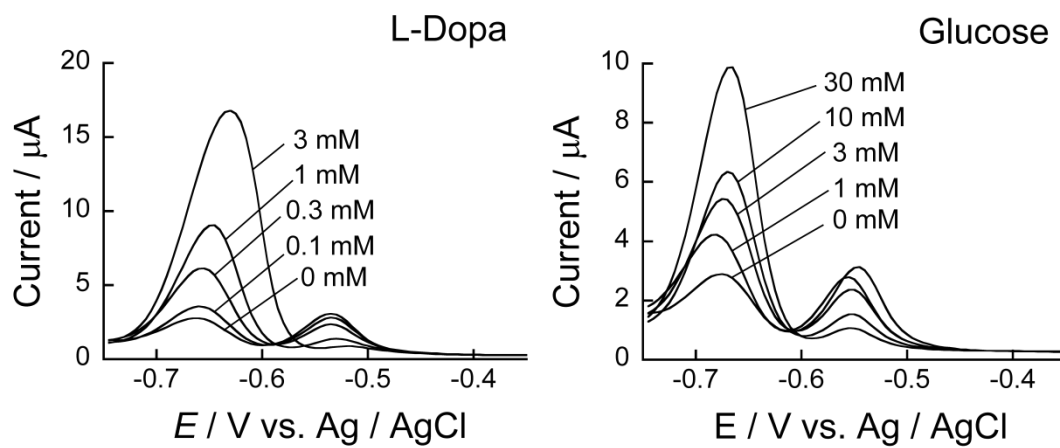

DPVs of the ARS-confined (PBA-PEI/CMC)<sub>10</sub>PBA-PEI film-coated electrodes in the absence and presence of L-dopa (0.1-3 mM) and glucose (1-30 mM) at pH 9.0.
